# Supplementary material for: A New Fiji-Based Algorithm That Systematically Quantifies Nine Synaptic Parameters Provides Insights into Drosophila NMJ Morphometry
Source: PLoS Comput Biol. 2016 Mar 21;12(3):e1004823. doi: 10.1371/journal.pcbi.1004823 (PMC4801422; doi:10.1371/journal.pcbi.1004823)
Supplement: S1 Table — (XLSX) [file pcbi.1004823.s001.xlsx]

## Sheet: TableS1A
NMJ area
picture	manual-#1	manual-#2	avg. manual	stdv manual	macro	deviation	%deviation
1	599.441	592.173	595.807	5.13925	563.076	32.7311	5.49357
2	472.331	461.947	467.139	7.3426	368.391	98.7482	21.1389
3	473.039	468.179	470.609	3.43654	474.6	-3.99068	-0.847982
4	400.224	394.991	397.607	3.70029	408.518	-10.9108	-2.74411
5	388.485	382.131	385.308	4.49296	390.349	-5.04051	-1.30818
6	377.414	370.465	373.939	4.91369	302.018	71.9215	19.2335
7	371.128	330.784	350.956	28.5275	327.618	23.338	6.64983
8	363.656	353.366	358.511	7.27613	413.18	-54.6694	-15.249
9	531.572	521.287	526.429	7.27259	442.173	84.2565	16.0053
10	372.918	366.589	369.754	4.47528	311.634	58.1199	15.7186
11	338.931	345.698	342.314	4.78499	257.228	85.0862	24.8561
12	434.981	427.528	431.255	5.27007	455.244	-23.9891	-5.56262
13	424.346	410.308	417.327	9.92636	322.123	95.2036	22.8127
14	287.774	264.531	276.153	16.4353	278	-1.8475	-0.669014
15	388.111	366.59	377.351	15.2176	440.029	-62.6787	-16.6102
16	439.102	442.529	440.815	2.42325	420.382	20.4338	4.63545
17	419.705	399.401	409.553	14.3571	430.58	-21.0271	-5.13416
18	437.79	430.973	434.382	4.82035	415.262	19.1198	4.40161
19	434.044	421.63	427.837	8.77802	452.246	-24.4095	-5.70532
20	554.278	550.694	552.486	2.53427	554.688	-2.20225	-0.398607
21	343.822	334.874	339.348	6.32719	382.544	-43.1956	-12.729
22	408.965	413.969	411.467	3.53836	361.106	50.3608	12.2393
23	380.452	383.687	382.07	2.28749	379.567	2.50215	0.654893
24	381.431	391.365	386.398	7.0244	371.513	14.8853	3.85232
25	556.63	546.308	551.469	7.29876	540.889	10.5798	1.91848
26	365.343	360.364	362.853	3.52068	328.388	34.4654	9.49843
27	383.012	377.321	380.167	4.02414	417.718	-37.5512	-9.87755
28	243.173	220.013	231.593	16.3766	246.51	-14.9166	-6.44087
29	355.456	364.621	360.038	6.48063	381.649	-21.6102	-6.00218
30	274.412	270.654	272.533	2.65731	318.086	-45.5526	-16.7145

## Sheet: TableS1B
NMJ perimeter
picture	manual-#1	manual-#2	avg. manual	std. Manual	macro	deviation	%deviation
1	326.394	326.195	326.294	0.140714	370.711	-44.4166	-13.6124
2	240.369	240.556	240.463	0.132229	253.881	-13.4183	-5.5802
3	299.186	333.086	316.136	23.9709	315.875	0.261215	0.0826274
4	238.487	255.672	247.079	12.1516	247.51	-0.43071	-0.174321
5	247.746	247.349	247.547	0.280721	255.429	-7.88152	-3.18384
6	186.84	190.073	188.457	2.28608	219.077	-30.6202	-16.2479
7	207.759	198.255	203.007	6.72034	207.275	-4.26833	-2.10255
8	228.102	221.579	224.841	4.61246	244.431	-19.5907	-8.71316
9	399.136	390.546	394.841	6.07405	383.973	10.8681	2.75252
10	277.372	271.311	274.341	4.28577	287.182	-12.8406	-4.68053
11	210.17	225.346	217.758	10.7311	226.604	-8.84552	-4.06209
12	277.066	269.312	273.189	5.48291	303.858	-30.669	-11.2263
13	253.308	240.002	246.655	9.40876	280.338	-33.6834	-13.6561
14	198.947	189	193.974	7.03359	206	-12.0265	-6.20007
15	265.239	253.499	259.369	8.30143	280.902	-21.5328	-8.30198
16	309.626	300.871	305.248	6.19072	336.162	-30.9135	-10.1273
17	283.433	274.397	278.915	6.38942	308.157	-29.2415	-10.484
18	287.056	290.586	288.821	2.49609	309.714	-20.8934	-7.23402
19	263.004	277.978	270.491	10.5882	283.368	-12.8767	-4.76048
20	357.726	358.911	358.318	0.837922	366.369	-8.05053	-2.24675
21	185.218	198.433	191.825	9.34442	189.596	2.22998	1.1625
22	242.401	216.476	229.439	18.3317	247.011	-17.5725	-7.65892
23	233.385	256.647	245.016	16.4487	242.039	2.97723	1.21512
24	251.33	264.183	257.757	9.08844	260.61	-2.85306	-1.10688
25	374.656	341.521	358.089	23.43	362.916	-4.82711	-1.34802
26	238.173	231.741	234.957	4.54811	240.124	-5.16674	-2.19902
27	244.4	229.411	236.906	10.5988	248.763	-11.8577	-5.00524
28	170.749	151.266	161.007	13.7766	169.119	-8.11108	-5.0377
29	247.206	263.33	255.268	11.4014	254.215	1.05313	0.412559
30	179.722	171.666	175.694	5.69645	182.101	-6.40653	-3.64641

## Sheet: TableS1C
Boutons
picture	manual-#1	manual-#2	avg. manual	std. Manual	macro	deviation	%deviation
1	28	23	25.5	3.53553	16	9.5	37.2549
2	22	20	21	1.41421	14	7	33.3333
3	23	32	27.5	6.36396	18	9.5	34.5455
4	23	26	24.5	2.12132	13	11.5	46.9388
5	25	26	25.5	0.707107	16	9.5	37.2549
6	25	24	24.5	0.707107	14	10.5	42.8571
7	25	25	25	0	14	11	44
8	30	31	30.5	0.707107	17	13.5	44.2623
9	44	40	42	2.82843	23	19	45.2381
10	26	23	24.5	2.12132	19	5.5	22.449
11	22	23	22.5	0.707107	14	8.5	37.7778
12	22	22	22	0	15	7	31.8182
13	25	26	25.5	0.707107	17	8.5	33.3333
14	19	17	18	1.41421	10	8	44.4444
15	23	28	25.5	3.53553	14	11.5	45.098
16	29	33	31	2.82843	20	11	35.4839
17	25	23	24	1.41421	21	3	12.5
18	30	28	29	1.41421	21	8	27.5862
19	28	29	28.5	0.707107	18	10.5	36.8421
20	23	27	25	2.82843	19	6	24
21	18	25	21.5	4.94975	13	8.5	39.5349
22	24	24	24	0	14	10	41.6667
23	22	23	22.5	0.707107	15	7.5	33.3333
24	22	21	21.5	0.707107	17	4.5	20.9302
25	32	30	31	1.41421	21	10	32.2581
26	20	22	21	1.41421	16	5	23.8095
27	21	20	20.5	0.707107	13	7.5	36.5854
28	17	18	17.5	0.707107	12	5.5	31.4286
29	20	23	21.5	2.12132	15	6.5	30.2326
30	17	15	16	1.41421	9	7	43.75

## Sheet: TableS1D
NMJ Length
picture	manual-#1	manual-#2	avg. manual	std. Manual	macro	deviation	%deviation
1	140.4	142.065	141.233	1.17733	152.606	-11.3738	-8.05328
2	112.918	101.115	107.017	8.34598	115.104	-8.08783	-7.55755
3	123.708	123.494	123.601	0.151321	133.804	-10.2026	-8.25443
4	99.134	95.173	97.1535	2.80085	103.806	-6.65272	-6.84764
5	102.816	101.063	101.94	1.23956	108.093	-6.15373	-6.03665
6	92.925	89.611	91.268	2.34335	95.4652	-4.19724	-4.5988
7	89.233	91.915	90.574	1.89646	93.1407	-2.5667	-2.83382
8	103.759	100.619	102.189	2.22032	97.3032	4.88578	4.78112
9	157.066	166.742	161.904	6.84197	163.108	-1.20408	-0.7437
10	128.238	126.96	127.599	0.903682	132.595	-4.99592	-3.91533
11	96.761	98.268	97.5145	1.06561	95.2382	2.27628	2.3343
12	124.092	126.664	125.378	1.81868	131.862	-6.48446	-5.17193
13	111.457	118.756	115.106	5.16117	116.674	-1.56778	-1.36202
14	86	90.6	88.3	3.25269	87.2282	1.0718	1.21382
15	118.639	120.621	119.63	1.40149	120.021	-0.3912	-0.327008
16	150.723	144.494	147.608	4.40457	155.187	-7.5784	-5.13412
17	131.277	127.903	129.59	2.38578	134	-4.41012	-3.40313
18	119.171	124.598	121.885	3.83747	125.8	-3.91538	-3.21237
19	118.364	121.69	120.027	2.35184	125.301	-5.27431	-4.39427
20	150.359	134.984	142.672	10.8718	157.049	-14.3776	-10.0774
21	77.86	82.576	80.218	3.33472	83.6916	-3.47356	-4.33015
22	100.369	103.282	101.826	2.0598	109.653	-7.82743	-7.6871
23	97.903	104.413	101.158	4.60327	103.874	-2.71647	-2.68538
24	105.681	108.627	107.154	2.08314	113.561	-6.40719	-5.97942
25	150.816	151.71	151.263	0.632153	163.629	-12.3664	-8.17542
26	99.326	95.364	97.345	2.80156	104.54	-7.1953	-7.39155
27	106.746	102.003	104.375	3.35381	118.235	-13.8602	-13.2793
28	72.764	69.648	71.206	2.20334	74.8909	-3.68488	-5.17495
29	108.926	106.911	107.918	1.42482	113.187	-5.26861	-4.88203
30	70.133	65.461	67.797	3.3036	70.0579	-2.26094	-3.33487

## Sheet: TableS1E
NMJ Longest branch length
picture	manual-#1	manual-#2	avg. manual	std. Manual	macro	deviation	%deviation
1	118.375	119.707	119.041	0.941866	128.162	-9.12091	-7.66199
2	80.907	75.538	78.2225	3.79646	87.317	-9.09449	-11.6264
3	119.875	116.015	117.945	2.72943	129.923	-11.9778	-10.1554
4	97.1535	95.173	96.1633	1.40042	103.806	-7.64297	-7.94792
5	99.244	101.063	100.154	1.28623	104.347	-4.19303	-4.1866
6	78.509	74.802	76.6555	2.62124	81.7171	-5.06158	-6.60302
7	74.348	75.699	75.0235	0.955301	78.8505	-3.82698	-5.10104
8	87.051	80.974	84.0125	4.29709	81.0035	3.00899	3.5816
9	140.715	155.222	147.969	10.258	144.626	3.34258	2.25898
10	84.978	82.118	83.548	2.02233	92.5375	-8.98952	-10.7597
11	96.761	98.268	97.5145	1.06561	95.2382	2.27628	2.3343
12	109.171	103.449	106.31	4.04607	117.063	-10.7527	-10.1145
13	111.457	118.756	115.106	5.16117	116.674	-1.56778	-1.36202
14	79	67.418	73.209	8.18971	80.5117	-7.3027	-9.97514
15	83.38	85.974	84.677	1.83423	86.9206	-2.24358	-2.64957
16	119.254	113.815	116.535	3.84595	128.478	-11.9432	-10.2486
17	113.528	110.009	111.769	2.48831	114.848	-3.07981	-2.75553
18	106.25	113.846	110.048	5.37118	111.347	-1.29864	-1.18007
19	84.381	89.782	87.0815	3.81908	89.3898	-2.30825	-2.65068
20	116.9	108.313	112.607	6.07193	119.932	-7.32566	-6.50554
21	77.86	82.576	80.218	3.33472	83.6916	-3.47356	-4.33015
22	89.535	93.462	91.4985	2.77681	97.8255	-6.327	-6.91487
23	81.009	83.135	82.072	1.50331	91.1072	-9.03519	-11.0089
24	94.15	99.493	96.8215	3.77807	96.3054	0.516143	0.533087
25	150.816	151.71	151.263	0.632153	163.629	-12.3664	-8.17542
26	99.326	96.111	97.7185	2.27335	104.54	-6.8218	-6.98107
27	69.625	64.351	66.988	3.72928	83.9946	-17.0066	-25.3875
28	60.991	58.136	59.5635	2.01879	65.8254	-6.26192	-10.513
29	98.089	99.888	98.9885	1.27209	102.938	-3.94963	-3.98999
30	70.133	65.461	67.797	3.3036	70.0579	-2.26094	-3.33487

## Sheet: TableS1F
#Islands
picture	manual-#1	manual-#2	avg. manual	std. Manual	macro	true positives	false negatives	false positives	sensitivity	specificity
1	1	1	1	0	1	1	0	0	1	1
2	1	1	1	0	1	1	0	0	1	1
3	2	2	2	0	2	2	0	0	1	1
4	2	2	2	0	2	2	0	0	1	1
5	2	2	2	0	2	2	0	0	1	1
6	1	1	1	0	1	1	0	0	1	1
7	1	1	1	0	1	1	0	0	1	1
8	2	2	2	0	2	2	0	0	1	1
9	3	3	3	0	3	3	0	0	1	1
10	1	1	1	0	1	1	0	0	1	1
11	2	2	2	0	2	2	0	0	1	1
12	1	1	1	0	1	1	0	0	1	1
13	2	2	2	0	2	2	0	0	1	1
14	2	2	2	0	2	2	0	0	1	1
15	2	2	2	0	2	2	0	0	1	1
16	2	2	2	0	2	2	0	0	1	1
17	2	2	2	0	2	2	0	0	1	1
18	4	4	4	0	3	3	1	0	1	0.75
19	1	1	1	0	1	1	0	0	1	1
20	2	2	2	0	2	2	0	0	1	1
21	1	1	1	0	1	1	0	0	1	1
22	2	2	2	0	2	2	0	0	1	1
23	2	2	2	0	2	2	0	0	1	1
24	2	2	2	0	2	2	0	0	1	1
25	2	2	2	0	2	2	0	0	1	1
26	2	2	2	0	3	2	0	1	0.666667	1
27	1	1	1	0	1	1	0	0	1	1
28	1	1	1	0	1	1	0	0	1	1
29	1	1	1	0	1	1	0	0	1	1
30	2	2	2	0	2	2	0	0	1	1

## Sheet: TableS1G
#Branches
picture	manual-#1	manual-#2	avg. manual	std. Manual	macro	true positives	false negatives	false positives	sensitivity	specificity
1	3	3	3	0	5	3	0	2	0.6	1
2	5	5	5	0	3	3	2	0	1	0.6
3	6	6	6	0	6	6	0	0	1	1
4	2	2	2	0	2	2	0	0	1	1
5	4	4	4	0	4	4	0	0	1	1
6	3	3	3	0	5	3	0	2	0.6	1
7	5	5	5	0	5	5	0	0	1	1
8	4	4	4	0	4	4	0	0	1	1
9	7	7	7	0	7	7	0	0	1	1
10	7	7	7	0	7	7	0	0	1	1
11	2	2	2	0	2	2	0	0	1	1
12	3	3	3	0	3	3	0	0	1	1
13	2	2	2	0	2	2	0	0	1	1
14	6	6	6	0	6	6	0	0	1	1
15	8	8	8	0	8	8	0	0	1	1
16	7	7	7	0	6	6	1	0	1	0.857143
17	8	8	8	0	8	8	0	0	1	1
18	8	8	8	0	7	7	1	0	1	0.875
19	5	5	5	0	7	5	0	2	0.714286	1
20	7	7	7	0	6	6	1	0	1	0.857143
21	1	1	1	0	1	1	0	0	1	1
22	4	4	4	0	4	4	0	0	1	1
23	6	6	6	0	6	6	0	0	1	1
24	4	4	4	0	4	4	0	0	1	1
25	2	2	2	0	2	2	0	0	1	1
26	2	2	2	0	3	2	0	1	0.666667	1
27	3	3	3	0	5	3	0	2	0.6	1
28	3	3	3	0	3	3	0	0	1	1
29	5	5	5	0	5	5	0	0	1	1
30	2	2	2	0	2	2	0	0	1	1

## Sheet: TableS1H
#Branching points
picture	manual-#1	manual-#2	avg. manual	std. Manual	macro	true positives	false negatives	false positives	sensitivity	specificity
1	1	1	1	0	2	1	0	1	0.5	1
2	2	2	2	0	1	1	1	0	1	0.5
3	2	2	2	0	2	2	0	0	1	1
4	0	0	0	0	0	0	0	0	1	1
5	1	1	1	0	1	1	0	0	1	1
6	1	1	1	0	2	1	0	1	0.5	1
7	2	2	2	0	2	2	0	0	1	1
8	1	1	1	0	1	1	0	0	1	1
9	2	2	2	0	2	2	0	0	1	1
10	3	3	3	0	3	3	0	0	1	1
11	0	0	0	0	0	0	0	0	1	1
12	1	1	1	0	1	1	0	0	1	1
13	0	0	0	0	0	0	0	0	1	1
14	2	2	2	0	2	2	0	0	1	1
15	3	3	3	0	3	3	0	0	1	1
16	2	2	2	0	2	2	0	0	1	1
17	3	3	3	0	3	3	0	0	1	1
18	2	2	2	0	2	2	0	0	1	1
19	2	2	2	0	3	2	0	1	0.666667	1
20	2	2	2	0	2	2	0	0	1	1
21	0	0	0	0	0	0	0	0	1	1
22	1	1	1	0	1	1	0	0	1	1
23	2	2	2	0	2	2	0	0	1	1
24	1	1	1	0	4	1	0	3	0.25	1
25	0	0	0	0	0	0	0	0	1	1
26	0	0	0	0	0	0	0	0	1	1
27	1	1	1	0	2	1	0	1	0.5	1
28	1	1	1	0	1	1	0	0	1	1
29	2	2	2	0	2	2	0	0	1	1
30	0	0	0	0	0	0	0	0	1	1

## Sheet: TableS1I
#Active zones
picture	manual-#1	macro	true positives	false negatives	false positives	sensitivity	specificity
1	249	250	226	23	24	0.904	0.907631
2	267	270	252	15	18	0.933333	0.94382
3	239	251	227	12	24	0.904382	0.949791
4	282	277	260	22	17	0.938628	0.921986
5	284	297	272	12	25	0.915825	0.957746
6	235	237	220	15	17	0.92827	0.93617
7	233	244	223	10	21	0.913934	0.957082
8	247	242	218	29	24	0.900826	0.882591
9	360	375	338	22	37	0.901333	0.938889
10	270	277	254	16	23	0.916968	0.940741
11	253	249	228	25	21	0.915663	0.901186
12	250	252	232	18	14	0.943089	0.928
13	233	236	215	18	21	0.911017	0.922747
14	177	181	163	14	18	0.900552	0.920904
15	230	231	209	21	22	0.904762	0.908696
16	261	251	235	26	16	0.936255	0.900383
17	267	278	245	22	33	0.881295	0.917603
18	337	347	321	16	26	0.925072	0.952522
19	316	307	287	29	17	0.944079	0.908228
20	368	362	336	32	26	0.928177	0.913043
21	272	281	254	18	27	0.903915	0.933824
22	249	263	238	11	25	0.904943	0.955823
23	267	273	255	12	18	0.934066	0.955056
24	275	259	246	29	13	0.949807	0.894545
25	304	306	277	27	29	0.905229	0.911184
26	245	242	222	23	20	0.917355	0.906122
27	289	302	268	21	34	0.887417	0.927336
28	194	206	183	11	23	0.88835	0.943299
29	273	292	257	16	35	0.880137	0.941392
30	244	243	223	21	20	0.917695	0.913934
