# Supplementary material for: A New Fiji-Based Algorithm That Systematically Quantifies Nine Synaptic Parameters Provides Insights into Drosophila NMJ Morphometry
Source: PLoS Comput Biol. 2016 Mar 21;12(3):e1004823. doi: 10.1371/journal.pcbi.1004823 (PMC4801422; doi:10.1371/journal.pcbi.1004823)
Supplement: S2 Table — (XLSX) [file pcbi.1004823.s002.xlsx]

## Sheet: TableS3A
	number of cases
	A2	A3	A4	A5
All	148	356	399	198
	A2		A3		A4		A5
	mean	CI95	mean	CI95	mean	CI95	mean	CI95
Active zones	301	291 - 311	289	283 - 295	288	282 - 293	280	272 - 287
Branches	6.33108	5.91 - 6.75	5.53371	5.29 - 5.78	5.26316	5.01 - 5.52	5.07071	4.76 - 5.39
Branching points	2.04054	1.83 - 2.25	1.74157	1.62 - 1.86	1.61404	1.49 - 1.74	1.57576	1.42 - 1.73
Islands	2.25	2.09 - 2.41	2.04	1.94 - 2.14	2.05	1.96 - 2.14	1.94	1.81 - 2.07
Length	121	118 - 125	127	125 - 129	128	125 - 130	125	122 - 129
Longest branch length	102	99 - 106	109	107 - 112	112	110 - 115	110	107 - 114
Muscle area	63715	62318 - 65111	65242	64299 - 66185	63278	62411 - 64144	59511	58376 - 60646
NMJ area	418	405 - 432	449	439 - 458	449	440 - 458	427	414 - 439
Perimeter	289	281 - 296	298	293 - 304	297	291 - 303	286	276 - 296
	p-values							P<0.05
	A2-A3	A2-A4	A2-A5	A3-A4	A3-A5	A4-A5
Active zones	0.165981	0.0726527	0.0028496	0.972194	0.189201	0.339055
Branches	0.00552	4.66e-05	1.8e-05	0.437	0.149	0.807
Branching points	0.0568	0.00151	0.00242	0.472	0.411	0.984
Islands	0.11	0.131523	0.0134003	0.998735	0.609242	0.512111
Length	0.0519319	0.0194811	0.338423	0.977583	0.867149	0.673108
Longest branch length	0.0093385	6.21e-05	0.0070593	0.362526	0.961623	0.821386
Muscle area	0.279403	0.954287	6.13e-05	0.0111793	0	4.8e-06
NMJ area	0.0033217	0.0020578	0.82926	0.999639	0.0303176	0.0202243
Perimeter	0.316351	0.416922	0.977041	0.992788	0.0791694	0.121256

## Sheet: TableS3B
	number of cases
	A2	A3	A4	A5
Male ; GD library	47	94	118	52
	A2		A3		A4		A5
	mean	CI95	mean	CI95	mean	CI95	mean	CI95
Active zones	268	252 - 285	267	256 - 277	270	260 - 280	261	248 - 275
Branches	6.21	5.48 - 6.95	5.74	5.24 - 6.25	5.56	4.99 - 6.12	5.54	4.86 - 6.22
Branching points	1.89	1.55 - 2.24	1.82	1.58 - 2.06	1.75	1.48 - 2.02	1.69	1.35 - 2.04
Islands	2.38	2.08 - 2.69	2.06	1.86 - 2.27	2.08	1.90 - 2.26	2.19	1.96 - 2.43
Length	113	108 - 117	122	117 - 127	123	119 - 128	123	116 - 131
Longest branch length	98	93 - 103	104	99 - 108	107	102 - 111	111	105 - 118
Muscle area	59692	57181 - 62204	62254	60648 - 63859	61683	60008 - 63359	56961	55077 - 58845
NMJ area	360	339 - 382	396	379 - 413	415	399 - 432	385	360 - 410
Perimeter	272	259 - 284	291	279 - 303	293	281 - 305	289	269 - 309
	p-values							P<0.05
	A2-A3	A2-A4	A2-A5	A3-A4	A3-A5	A4-A5
Active zones	0.99843	0.998823	0.912292	0.978688	0.932595	0.777159
Branches	0.77257	0.508344	0.610305	0.961077	0.972049	0.999965
Branching points	0.988725	0.925996	0.869668	0.980515	0.943171	0.99192
Islands	0.25912	0.263057	0.765004	0.999717	0.870837	0.890743
Length	0.117759	0.048485	0.114265	0.984344	0.989907	0.999996
Longest branch length	0.437377	0.074624	0.012655	0.699767	0.184556	0.632109
Muscle area	0.31425	0.509137	0.363796	0.960069	0.0015824	0.0041412
NMJ area	0.0922205	0.0012794	0.466399	0.357698	0.8888	0.152015
Perimeter	0.3024	0.182478	0.51453	0.993337	0.997183	0.973499

## Sheet: TableS3C
	number of cases
	A2	A3	A4	A5
Female ; GD library	30	72	76	44
	A2		A3		A4		A5
	mean	CI95	mean	CI95	mean	CI95	mean	CI95
Active zones	319	292 - 346	296	283 - 310	293	281 - 305	285	266 - 303
Branches	6.6	5.48 - 7.72	5.9	5.33 - 6.47	5.64	5.02 - 6.27	4.8	4.04 - 5.55
Branching points	2.23	1.68 - 2.79	1.82	1.54 - 2.10	1.66	1.37 - 1.95	1.43	1.03 - 1.84
Islands	2.13	1.80 - 2.47	2.25	1.97 - 2.53	2.32	2.11 - 2.52	1.98	1.65 - 2.30
Length	128	118 - 138	133	128 - 138	130	125 - 135	127	119 - 134
Longest branch length	107	98 - 115	117	112 - 122	114	109 - 119	113	105 - 122
Muscle area	69732	66500 - 72964	69267	66644 - 71890	68132	66302 - 69963	61299	59156 - 63442
NMJ area	447	416 - 477	456	436 - 477	447	424 - 470	425	399 - 451
Perimeter	306	287 - 325	316	306 - 326	311	298 - 323	299	283 - 314
	p-values							P<0.05
	A2-A3	A2-A4	A2-A5	A3-A4	A3-A5	A4-A5
Active zones	0.293969	0.170729	0.0729983	0.983079	0.741011	0.894469
Branches	0.615421	0.33497	0.0215316	0.933153	0.12682	0.324371
Branching points	0.447439	0.16197	0.0435282	0.869398	0.391642	0.788031
Islands	0.954216	0.845149	0.919462	0.98019	0.51293	0.310201
Length	0.714465	0.965774	0.994964	0.861163	0.437145	0.836714
Longest branch length	0.181677	0.451972	0.616099	0.881756	0.857352	0.99851
Muscle area	0.995395	0.846409	0.0006746	0.872274	4.48e-05	0.0005561
NMJ area	0.960958	1	0.757074	0.920287	0.28617	0.598933
Perimeter	0.785898	0.971683	0.93296	0.91172	0.275842	0.59871

## Sheet: TableS3D
	number of cases
	A2	A3	A4	A5
Male ; KK library	54	136	151	72
	A2		A3		A4		A5
	mean	CI95	mean	CI95	mean	CI95	mean	CI95
Active zones	315	301 - 330	290	280 - 300	293	284 - 301	276	265 - 288
Branches	6.43	5.72 - 7.13	5.31	4.93 - 5.69	4.98	4.60 - 5.36	5.19	4.73 - 5.66
Branching points	2.13	1.74 - 2.52	1.66	1.48 - 1.85	1.52	1.33 - 1.72	1.67	1.45 - 1.89
Islands	2.2	1.89 - 2.51	2.01	1.87 - 2.15	1.96	1.81 - 2.11	1.88	1.64 - 2.11
Length	125	120 - 131	124	121 - 128	129	125 - 133	124	119 - 130
Longest branch length	104	98 - 110	107	103 - 111	114	110 - 118	107	103 - 112
Muscle area	64181	62205 - 66157	63396	62137 - 64656	61164	59959 - 62370	58548	56585 - 60510
NMJ area	445	427 - 463	458	444 - 472	460	447 - 472	436	417 - 455
Perimeter	295	282 - 308	290	280 - 300	292	281 - 303	275	257 - 292
	p-values							P<0.05
	A2-A3	A2-A4	A2-A5	A3-A4	A3-A5	A4-A5
Active zones	0.0173741	0.0403608	0.0003776	0.969165	0.312651	0.146129
Branches	0.0140336	0.0004891	0.0161297	0.620288	0.986251	0.914929
Branching points	0.0629824	0.0063037	0.124563	0.747467	0.999991	0.826627
Islands	0.573319	0.370953	0.220659	0.975195	0.774702	0.923538
Length	0.995707	0.743963	0.996937	0.342599	1	0.515371
Longest branch length	0.842602	0.0508347	0.863106	0.0931996	0.999943	0.243797
Muscle area	0.91817	0.0606714	0.000268	0.0637053	8.91e-05	0.0777377
NMJ area	0.756137	0.674404	0.906942	0.998433	0.219894	0.157291
Perimeter	0.951995	0.987477	0.260461	0.992655	0.337125	0.215256

## Sheet: TableS3E
	number of cases
	A2	A3	A4	A5
Female ; KK library	17	54	54	30
	A2		A3		A4		A5
	mean	CI95	mean	CI95	mean	CI95	mean	CI95
Active zones	312	294 - 330	319	305 - 333	306	293 - 319	311	295 - 328
Branches	5.88	4.76 - 7.00	5.24	4.63 - 5.85	4.87	4.36 - 5.38	4.37	3.62 - 5.11
Branching points	1.82	1.33 - 2.31	1.7	1.39 - 2.02	1.5	1.24 - 1.76	1.37	1.05 - 1.68
Islands	2.24	1.89 - 2.58	1.81	1.62 - 2.01	1.89	1.72 - 2.05	1.6	1.39 - 1.81
Length	120	112 - 128	134	127 - 140	130	124 - 137	129	121 - 138
Longest branch length	102	95 - 109	115	109 - 121	117	110 - 123	112	104 - 120
Muscle area	62735	59389 - 66081	69727	67510 - 71945	65838	63301 - 68375	63619	60190 - 67047
NMJ area	442	394 - 491	506	484 - 527	497	473 - 522	478	447 - 509
Perimeter	284	262 - 305	310	297 - 322	303	289 - 316	289	265 - 314
	p-values							P<0.05
	A2-A3	A2-A4	A2-A5	A3-A4	A3-A5	A4-A5
Active zones	0.952794	0.966656	0.999952	0.482215	0.893036	0.959115
Branches	0.676695	0.292174	0.0762277	0.78568	0.246949	0.704946
Branching points	0.974363	0.663029	0.452276	0.725807	0.467141	0.93921
Islands	0.0884732	0.212662	0.0071527	0.931311	0.454933	0.198578
Length	0.142096	0.374871	0.535565	0.86433	0.838811	0.99808
Longest branch length	0.150492	0.0840379	0.470639	0.981143	0.911746	0.759831
Muscle area	0.020851	0.5671	0.986656	0.092193	0.0116888	0.670469
NMJ area	0.041289	0.0982588	0.523407	0.956723	0.474465	0.742237
Perimeter	0.263401	0.553376	0.982557	0.880465	0.306363	0.681041
