# Supplementary material for: A New Fiji-Based Algorithm That Systematically Quantifies Nine Synaptic Parameters Provides Insights into Drosophila NMJ Morphometry
Source: PLoS Comput Biol. 2016 Mar 21;12(3):e1004823. doi: 10.1371/journal.pcbi.1004823 (PMC4801422; doi:10.1371/journal.pcbi.1004823)
Supplement: S3 Table — (XLSX) [file pcbi.1004823.s003.xlsx]

## Sheet: Table S4A
ALL	Principal component 1			Principal component 2			Principal component 3			Principal component 4			Principal component 5
	Dim.1	ctr	cos2	Dim.2	ctr	cos2	Dim.3	ctr	cos2	Dim.4	ctr	cos2	Dim.5	ctr	cos2
NMJ Area	0.703	14.445	0.495	-0.148	1.12	0.022	-0.382	12.118	0.146	0.111	1.302	0.012	-0.096	1.308	0.009
Perimeter	0.876	22.409	0.767	0.012	0.007	0	0.178	2.636	0.032	-0.086	0.786	0.007	-0.221	6.897	0.049
Length	0.922	24.811	0.849	-0.031	0.048	0.001	0.014	0.017	0	-0.202	4.336	0.041	-0.145	3.001	0.021
Longest branch length	0.807	19.008	0.651	-0.391	7.842	0.153	0.232	4.471	0.054	-0.129	1.767	0.017	-0.103	1.511	0.011
Branches	0.318	2.962	0.101	0.932	44.474	0.869	0.126	1.312	0.016	0.075	0.594	0.006	0.051	0.371	0.003
Branching points	0.245	1.76	0.06	0.939	45.13	0.881	-0.208	3.603	0.043	-0.06	0.38	0.004	-0.038	0.208	0.001
Islands	0.213	1.325	0.045	0.056	0.159	0.003	0.863	61.774	0.745	0.347	12.824	0.12	0.23	7.488	0.053
Muscle area	0.349	3.556	0.122	-0.106	0.578	0.011	-0.322	8.58	0.103	0.842	75.457	0.708	-0.025	0.09	0.001
Active zones	0.577	9.724	0.333	-0.112	0.642	0.013	-0.257	5.488	0.066	-0.155	2.553	0.024	0.747	79.126	0.558
Variance	3.424			1.953			1.205			0.939			0.705
% of variance	38.041			21.699			13.392			10.431			7.833
Cumulative % of variance	38.041			59.741			73.133			83.563			91.397

## Sheet: Table S4B
Male; GD	Principal component 1			Principal component 2			Principal component 3			Principal component 4			Principal component 5
	Dim.1	ctr	cos2	Dim.2	ctr	cos2	Dim.3	ctr	cos2	Dim.4	ctr	cos2	Dim.5	ctr	cos2
NMJ Area	0.705	13.219	0.496	-0.158	1.408	0.025	-0.386	12.46	0.149	0.031	0.107	0.503	0.226	8.216	0.051
Perimeter	0.915	22.312	0.838	-0.131	0.97	0.017	0.024	0.048	0.001	0.011	0.014	0	-0.205	6.752	0.042
Length	0.919	22.471	0.844	-0.139	1.085	0.019	0.022	0.042	0	-0.127	1.752	0.016	-0.113	2.042	0.013
Longest branch length	0.762	15.463	0.581	-0.487	13.365	0.237	0.226	4.264	0.051	-0.042	0.188	0.002	-0.134	2.878	0.018
Branches	0.521	7.241	0.272	0.83	38.782	0.689	0.137	1.572	0.019	0.124	1.67	0.015	-0.001	0	0
Branching points	0.44	5.159	0.194	0.873	42.885	0.762	-0.155	2.011	0.024	-0.064	0.438	0.004	-0.052	0.432	0.003
Islands	0.251	1.672	0.063	-0.007	0.003	0	0.793	52.525	0.63	0.506	27.638	0.256	0.129	2.671	0.017
Muscle area	0.253	1.706	0.064	-0.145	1.178	0.021	-0.57	27.079	0.325	0.709	54.395	0.503	0.226	8.216	0.051
Active zones	0.636	10.755	0.404	-0.076	0.323	0.006	0	0	0	-0.357	13.798	0.128	0.677	73.57	0.458
Variance	3.756			1.777			1.199			0.925			0.623
% of variance	41.729			19.739			13.318			10.278			6.919
Cumulative % of variance	41.729			61.468			74.787			85.064			91.983

## Sheet: Table S4C
Female; GD	Principal component 1			Principal component 2			Principal component 3			Principal component 4			Principal component 5
	Dim.1	ctr	cos2	Dim.2	ctr	cos2	Dim.3	ctr	cos2	Dim.4	ctr	cos2	Dim.5	ctr	cos2
NMJ Area	0.74	15.881	0.548	-0.01	0.006	0	-0.156	1.978	0.024	0.315	10.643	0.099	-0.181	4.249	0.033
Perimeter	0.933	25.201	0.87	-0.015	0.012	0	0.109	0.978	0.012	-0.098	1.03	0.01	-0.213	5.868	0.045
Length	0.942	25.708	0.887	-0.049	0.123	0.002	-0.115	1.086	0.013	-0.109	1.264	0.012	-0.109	1.549	0.012
Longest branch length	0.812	19.121	0.66	-0.434	9.484	0.188	0.107	0.934	0.011	-0.182	3.531	0.033	-0.067	0.583	0.004
Branches	0.261	1.979	0.068	0.944	44.869	0.89	0.155	1.952	0.024	-0.108	1.257	0.012	0.048	0.293	0.002
Branching points	0.237	1.633	0.056	0.942	44.702	0.887	-0.21	3.589	0.044	0.016	0.027	0	-0.009	0.011	0
Islands	0.09	0.236	0.008	0.059	0.177	0.004	0.909	67.581	0.827	-0.32	10.981	0.102	0.143	2.665	0.021
Muscle area	0.341	3.369	0.116	-0.001	0	0	0.384	12.07	0.148	0.786	66.137	0.617	0.291	10.964	0.085
Active zones	0.487	6.872	0.237	-0.112	0.627	0.012	-0.347	9.831	0.12	-0.219	5.131	0.048	0.755	73.819	0.569
Variance	3.451			1.984			1.223			0.933			0.771
% of variance	38.346			22.049			13.593			10.37			8.572
Cumulative % of variance	38.346			60.395			73.988			84.358			92.93

## Sheet: Table S4D
Male; KK	Principal component 1			Principal component 2			Principal component 3			Principal component 4			Principal component 5
	Dim.1	ctr	cos2	Dim.2	ctr	cos2	Dim.3	ctr	cos2	Dim.4	ctr	cos2	Dim.5	ctr	cos2
NMJ Area	0.643	13.252	0.414	-0.149	1.115	0.022	0.496	18.692	0.246	0.018	0.036	0	-0.079	0.819	0.006
Perimeter	0.829	22.039	0.688	0.074	0.278	0.006	-0.236	4.253	0.056	-0.064	0.447	0.004	-0.165	3.604	0.027
Length	0.912	26.628	0.831	0.013	0.008	0	-0.026	0.05	0.001	-0.179	3.466	0.032	-0.194	4.989	0.038
Longest branch length	0.821	21.598	0.674	-0.355	6.344	0.126	-0.217	3.584	0.047	-0.071	0.55	0.005	-0.129	2.182	0.017
Branches	0.288	2.662	0.083	0.937	44.249	0.878	-0.073	0.405	0.005	0.118	1.491	0.014	0.106	1.493	0.011
Branching points	0.163	0.851	0.027	0.954	45.823	0.909	0.216	3.551	0.047	-0.079	0.669	0.006	-0.027	0.093	0.001
Islands	0.337	3.646	0.114	-0.002	0	0	-0.703	37.593	0.494	0.496	26.57	0.246	0.329	14.307	0.108
Muscle area	0.238	1.817	0.057	-0.115	0.671	0.013	0.539	22.106	0.291	0.757	61.71	0.573	-0.095	1.198	0.009
Active zones	0.484	7.507	0.234	-0.173	1.511	0.03	0.358	9.767	0.128	-0.217	5.06	0.047	0.735	71.315	0.54
Variance	3.121			1.984			1.314			0.928			0.757
% of variance	34.673			22.047			14.604			10.308			8.409
Cumulative % of variance	34.673			56.719			71.324			81.632			90.041

## Sheet: Table S4E
Female; KK	Principal component 1			Principal component 2			Principal component 3			Principal component 4			Principal component 5
	Dim.1	ctr	cos2	Dim.2	ctr	cos2	Dim.3	ctr	cos2	Dim.4	ctr	cos2	Dim.5	ctr	cos2
NMJ Area	0.735	15.087	0.541	-0.155	1.157	0.024	-0.002	0	0	0.308	10.572	0.095	0.336	16.375	0.113
Perimeter	0.909	23.028	0.826	-0.017	0.015	0	-0.124	1.385	0.015	-0.128	1.821	0.016	0.223	7.193	0.05
Length	0.918	23.513	0.843	0.027	0.034	0.001	-0.269	6.491	0.072	-0.142	2.241	0.02	-0.002	0	0
Longest branch length	0.843	19.843	0.711	-0.365	6.419	0.133	-0.037	0.125	0.001	-0.183	3.736	0.034	-0.015	0.031	0
Branches	0.166	0.772	0.028	0.97	45.382	0.94	0.098	0.857	0.01	-0.074	0.607	0.005	0.112	1.82	0.013
Branching points	0.119	0.395	0.014	0.97	45.436	0.942	-0.182	2.968	0.033	0.051	0.291	0.003	0.059	0.498	0.003
Islands	0.163	0.745	0.027	0.037	0.066	0.001	0.885	70.435	0.783	-0.399	17.666	0.159	0.168	4.076	0.028
Muscle area	0.429	5.127	0.184	0.052	0.128	0.003	0.431	16.731	0.186	0.745	61.614	0.554	-0.113	1.86	0.013
Active zones	0.642	11.491	0.412	0.168	1.363	0.028	0.106	1.009	0.011	-0.114	1.453	0.013	-0.685	68.146	0.469
Variance	3.585			2.072			1.112			0.9			0.689
% of variance	39.833			23.024			12.356			9.998			7.655
Cumulative % of variance	39.833			62.857			75.213			85.21			92.865

## Sheet: Table S4F
Segment A2	Principal component 1			Principal component 2			Principal component 3			Principal component 4			Principal component 5
	Dim.1	ctr	cos2	Dim.2	ctr	cos2	Dim.3	ctr	cos2	Dim.4	ctr	cos2	Dim.5	ctr	cos2
NMJ Area	0.651	11.938	0.424	-0.175	1.644	0.031	-0.465	15.754	0.216	0.197	4.391	0.039	-0.3	16.636	0.09
Perimeter	0.9	22.808	0.81	-0.087	0.405	0.008	0.141	1.451	0.02	0.06	0.404	0.004	-0.228	9.633	0.052
Length	0.922	23.929	0.85	-0.017	0.016	0	0.093	0.625	0.009	-0.162	2.952	0.026	-0.084	1.319	0.007
Longest branch length	0.744	15.593	0.554	-0.42	9.426	0.176	0.291	6.183	0.085	-0.156	2.738	0.024	-0.04	0.294	0.002
Branches	0.469	6.187	0.22	0.823	36.189	0.677	0.261	4.964	0.068	0.109	1.341	0.012	0.099	1.805	0.01
Branching points	0.384	4.144	0.147	0.916	44.822	0.838	-0.062	0.277	0.004	0.019	0.039	0	0.027	0.13	0.001
Islands	0.173	0.846	0.03	-0.275	4.045	0.076	0.837	51.134	0.701	0.194	4.266	0.038	0.221	8.996	0.049
Muscle area	0.454	5.817	0.207	-0.224	2.687	0.05	-0.373	10.16	0.139	0.659	49.13	0.434	0.369	25.199	0.136
Active zones	0.557	8.737	0.31	-0.12	0.765	0.014	-0.36	9.452	0.13	-0.554	34.74	0.307	0.441	35.988	0.195
Variance	3.55			1.87			1.371			0.884			0.541
% of variance	39.445			20.778			15.238			9.82			6.007
Cumulative % of variance	39.445			60.224			75.462			85.282			91.288

## Sheet: Table S4G
Segment A3	Principal component 1			Principal component 2			Principal component 3			Principal component 4			Principal component 5
	Dim.1	ctr	cos2	Dim.2	ctr	cos2	Dim.3	ctr	cos2	Dim.4	ctr	cos2	Dim.5	ctr	cos2
NMJ Area	0.729	15.714	0.531	-0.072	0.26	0.005	-0.299	7.737	0.089	0.144	2.135	0.021	0.015	0.029	0
Perimeter	0.891	23.498	0.795	0.113	0.632	0.013	0.133	1.542	0.018	-0.116	1.394	0.013	-0.242	7.824	0.059
Length	0.915	24.778	0.838	0.077	0.294	0.006	-0.061	0.328	0.004	-0.189	3.693	0.036	-0.174	4.058	0.03
Longest branch length	0.868	22.289	0.754	-0.285	4.024	0.081	0.204	3.62	0.042	-0.071	0.526	0.005	-0.131	2.282	0.017
Branches	0.107	0.342	0.012	0.98	47.705	0.961	0.127	1.401	0.016	0.071	0.517	0.005	0.046	0.278	0.002
Branching points	0.042	0.053	0.002	0.963	46.055	0.927	-0.245	5.187	0.06	-0.053	0.289	0.003	-0.033	0.144	0.001
Islands	0.189	1.054	0.036	0.126	0.79	0.016	0.892	69.077	0.796	0.316	10.32	0.1	0.192	4.928	0.037
Muscle area	0.307	2.788	0.094	-0.055	0.151	0.003	-0.313	8.526	0.098	0.869	78.027	0.755	-0.004	0.003	0
Active zones	0.566	9.485	0.321	-0.043	0.09	0.002	-0.173	2.582	0.03	-0.173	3.099	0.03	0.776	80.454	0.602
Variance	3.381			2.014			1.153			0.968			0.749
% of variance	37.569			22.376			12.807			10.751			8.318
Cumulative % of variance	37.569			59.945			72.752			83.503			91.821

## Sheet: Table S4H
Segment A4	Principal component 1			Principal component 2			Principal component 3			Principal component 4			Principal component 5
	Dim.1	ctr	cos2	Dim.2	ctr	cos2	Dim.3	ctr	cos2	Dim.4	ctr	cos2	Dim.5	ctr	cos2
NMJ Area	0.713	13.976	0.508	-0.128	0.852	0.016	-0.394	13.814	0.155	0.178	3.302	0.032	-0.124	2.266	0.015
Perimeter	0.885	21.556	0.784	-0.033	0.058	0.001	0.13	1.513	0.017	-0.1	1.044	0.01	-0.236	8.248	0.056
Length	0.935	24.016	0.873	-0.07	0.256	0.005	-0.065	0.371	0.004	-0.173	3.123	0.03	-0.141	2.969	0.02
Longest branch length	0.806	17.864	0.65	-0.433	9.806	0.188	0.132	1.551	0.017	-0.158	2.581	0.025	-0.114	1.918	0.013
Branches	0.401	4.424	0.161	0.904	42.694	0.818	0.119	1.249	0.014	0.006	0.004	0	0.049	0.361	0.002
Branching points	0.305	2.555	0.093	0.921	44.335	0.849	-0.213	4.024	0.045	-0.024	0.058	0.001	-0.012	0.02	0
Islands	0.304	2.535	0.092	0.063	0.208	0.004	0.907	73.161	0.823	0.084	0.735	0.007	0.156	3.63	0.024
Muscle area	0.339	3.163	0.115	-0.08	0.332	0.006	-0.02	0.037	0	0.916	87.26	0.839	0.045	0.304	0.002
Active zones	0.6	9.912	0.36	-0.167	1.459	0.028	-0.219	4.279	0.048	-0.135	1.892	0.018	0.735	80.284	0.541
Variance	3.636			1.915			1.125			0.961			0.674
% of variance	40.405			21.278			12.496			10.681			7.484
Cumulative % of variance	40.405			61.683			74.179			84.86			92.344

## Sheet: Table S4I
Segment A5	Principal component 1			Principal component 2			Principal component 3			Principal component 4			Principal component 5
	Dim.1	ctr	cos2	Dim.2	ctr	cos2	Dim.3	ctr	cos2	Dim.4	ctr	cos2	Dim.5	ctr	cos2
NMJ Area	0.655	13.266	0.429	-0.253	3.291	0.064	-0.382	10.033	0.146	0.116	1.656	0.013	0.111	1.94	0.012
Perimeter	0.81	20.301	0.657	0.091	0.428	0.008	0.27	5.028	0.073	-0.068	0.576	0.005	-0.127	2.521	0.016
Length	0.906	25.371	0.821	-0.032	0.051	0.001	0.138	1.301	0.019	-0.183	4.169	0.034	-0.205	6.615	0.042
Longest branch length	0.771	18.387	0.595	-0.31	4.939	0.096	0.406	11.35	0.165	-0.133	2.206	0.018	-0.142	3.18	0.02
Branches	0.379	4.439	0.144	0.897	41.315	0.805	-0.036	0.088	0.001	0.188	4.356	0.035	0.076	0.91	0.006
Branching points	0.355	3.896	0.126	0.85	37.072	0.723	-0.371	9.443	0.137	-0.008	0.008	0	-0.052	0.434	0.003
Islands	0.066	0.136	0.004	0.138	0.982	0.019	0.81	45.074	0.655	0.47	27.411	0.221	0.305	14.606	0.093
Muscle area	0.327	3.303	0.107	-0.399	8.155	0.159	-0.401	11.053	0.161	0.683	57.7	0.466	-0.232	8.473	0.054
Active zones	0.594	10.902	0.353	-0.271	3.767	0.073	-0.31	6.631	0.096	-0.124	1.918	0.015	0.624	61.32	0.389
Variance	3.234			1.949			1.454			0.807			0.635
% of variance	35.937			21.656			16.156			8.971			7.056
Cumulative % of variance	35.937			57.594			73.749			82.721			89.777
