# Supplementary material for: A New Fiji-Based Algorithm That Systematically Quantifies Nine Synaptic Parameters Provides Insights into Drosophila NMJ Morphometry
Source: PLoS Comput Biol. 2016 Mar 21;12(3):e1004823. doi: 10.1371/journal.pcbi.1004823 (PMC4801422; doi:10.1371/journal.pcbi.1004823)
Supplement: S4 Table — (XLSX) [file pcbi.1004823.s004.xlsx]

## Sheet: TableS1A
NMJ area
picture	manual-#1	macro	deviation	%deviation
1	360	357	3	0.833333
2	239	321	-82	-34.3096
3	362	396	-34	-9.39227
4	490	456	34	6.93878
5	497	490	7	1.40845
6	268	296	-28	-10.4478
7	388	381	7	1.80412
8	254	268	-14	-5.51181
9	439	393	46	10.4784
10	295	297	-2	-0.677966
11	262	227	35	13.3588
12	382	411	-29	-7.59162
13	413	411	2	0.484262
14	449	396	53	11.804
15	246	231	15	6.09756

## Sheet: TableS1B
NMJ perimeter
picture	manual-#1	macro	deviation	%deviation
1	253	255	-2	-0.790514
2	174	198	-24	-13.7931
3	211	298	-87	-41.2322
4	344	313	31	9.01163
5	293	280	13	4.43686
6	164	159	5	3.04878
7	207	202	5	2.41546
8	173	175	-2	-1.15607
9	299	303	-4	-1.33779
10	216	211	5	2.31481
11	191	200	-9	-4.71204
12	280	259	21	7.5
13	370	373	-3	-0.810811
14	339	323	16	4.71976
15	192	191	1	0.520833

## Sheet: TableS1C
Boutons
picture	manual-#1	macro	deviation	%deviation
1	25	18	7	28
2	21	15	6	28.5714
3	15	14	1	6.66667
4	27	23	4	14.8148
5	14	14	0	0
6	17	9	8	47.0588
7	17	12	5	29.4118
8	14	9	5	35.7143
9	28	21	7	25
10	19	9	10	52.6316
11	16	13	3	18.75
12	33	20	13	39.3939
13	35	25	10	28.5714
14	27	20	7	25.9259
15	19	13	6	31.5789

## Sheet: TableS1D
NMJ Length
picture	manual-#1	macro	deviation	%deviation
1	113	109	4	3.53982
2	85	85	0	0
3	130.397	126	4.397	3.37201
4	137.202	145	-7.798	-5.68359
5	113	107	6	5.30973
6	68	71	-3	-4.41176
7	89.717	87	2.717	3.02841
8	76	75	1	1.31579
9	132	135	-3	-2.27273
10	91	96	-5	-5.49451
11	80	80	0	0
12	113	114	-1	-0.884956
13	158	149	9	5.6962
14	144	146	-2	-1.38889
15	85	83	2	2.35294

## Sheet: TableS1E
NMJ Longest branch length
picture	manual-#1	macro	deviation	%deviation
1	113	109	4	3.53982
2	85	85	0	0
3	130	126	4	3.07692
4	117	118	-1	-0.854701
5	113	106	7	6.19469
6	68	71	-3	-4.41176
7	71	71	0	0
8	76	75	1	1.31579
9	83	84	-1	-1.20482
10	91	96	-5	-5.49451
11	80	80	0	0
12	113	114	-1	-0.884956
13	142	138	4	2.8169
14	122	126	-4	-3.27869
15	77	76	1	1.2987

## Sheet: TableS1F
#Islands
picture	manual-#1	macro	true positives	false negatives	false positives	sensitivity	specificity
1	1	1	1	0	0	1	1
2	1	1	1	0	0	1	1
3	1	1	1	0	0	1	1
4	1	1	1	0	0	1	1
5	3	3	3	0	0	1	1
6	2	1	1	1	0	1	0.5
7	1	1	1	0	0	1	1
8	1	1	1	0	0	1	1
9	2	1	1	1	0	1	0.5
10	1	1	1	0	0	1	1
11	1	1	1	0	0	1	1
12	1	1	1	0	0	1	1
13	4	4	4	0	0	1	1
14	1	1	1	0	0	1	1
15	1	1	1	0	0	1	1

## Sheet: TableS1G
#Branches
picture	manual-#1	macro	true positives	false negatives	false positives	sensitivity	specificity
1	1	1	1	0	0	1	1
2	1	1	1	0	0	1	1
3	1	1	1	0	0	1	1
4	3	6	3	0	3	0.5	1
5	3	5	3	0	2	0.6	1
6	2	1	1	1	0	1	0.5
7	3	3	3	0	0	1	1
8	1	1	1	0	0	1	1
9	10	9	9	1	0	1	0.9
10	1	1	1	0	0	1	1
11	1	1	1	0	0	1	1
12	1	1	1	0	0	1	1
13	8	10	8	0	2	0.8	1
14	5	5	5	0	0	1	1
15	3	3	3	0	0	1	1

## Sheet: TableS1H
#Branching points
picture	manual-#1	macro	true positives	false negatives	false positives	sensitivity	specificity
1	0	0	0	0	0	1	1
2	0	0	0	0	0	1	1
3	0	0	0	0	0	1	1
4	1	3	1	0	1	0.5	1
5	0	1	0	1	0	1	0
6	0	0	0	0	0	1	1
7	1	1	1	0	0	1	1
8	0	0	0	0	0	1	1
9	3	4	3	0	1	0.75	1
10	0	0	0	0	0	1	1
11	0	0	0	0	0	1	1
12	0	0	0	0	0	1	1
13	2	3	2	0	1	0.666667	1
14	2	2	2	0	0	1	1
15	1	1	1	0	0	1	1

## Sheet: TableS1I
#Active zones
picture	manual-#1	macro	true positives	false negatives	false positives	sensitivity	specificity
1	NA	NA	NA	NA	NA	NA	NA
2	266	300	369	3	31	0.9225	0.991935
3	268	261	231	37	30	0.885057	0.86194
4	313	282	330	38	21	0.940171	0.896739
5	246	225	199	47	26	0.884444	0.808943
6	234	230	220	24	10	0.956522	0.901639
7	261	258	242	19	15	0.941634	0.927203
8	188	190	173	15	17	0.910526	0.920213
9	307	296	281	26	15	0.949324	0.915309
10	188	181	170	18	11	0.939227	0.904255
11	188	199	178	10	21	0.894472	0.946809
12	267	287	252	15	35	0.878049	0.94382
13	320	321	297	23	24	0.925234	0.928125
14	286	267	259	19	8	0.970037	0.931655
15	161	154	141	16	13	0.915584	0.898089
