# Supplementary material for: A New Fiji-Based Algorithm That Systematically Quantifies Nine Synaptic Parameters Provides Insights into Drosophila NMJ Morphometry
Source: PLoS Comput Biol. 2016 Mar 21;12(3):e1004823. doi: 10.1371/journal.pcbi.1004823 (PMC4801422; doi:10.1371/journal.pcbi.1004823)
Supplement: S5 Table — (XLSX) [file pcbi.1004823.s005.xlsx]

## Sheet: S5_Table
#Bouton measurements with Synaptotagmin staining
picture	manual-#1	manual-#2	avg. manual	std. Manual	macro	avg. true positives	avg. false negatives	avg. false positives	sensitivity	specificity
1	36	38	37	1.41421	37	36	1.5	0.5	0.986301	0.96
2	33	32	32.5	0.707107	34	32.5	0.5	1	0.970149	0.984848
3	35	29	32	4.24264	32	30.5	3	0	1	0.910448
4	32	29	30.5	2.12132	36	31	0	5	0.861111	1
5	28	27	27.5	0.707107	25	25	2.5	0	1	0.909091
6	35	32	33.5	2.12132	35	33	1	1.5	0.956522	0.970588
7	28	25	26.5	2.12132	24	23.5	3	0.5	0.979167	0.886792
8	24	25	24.5	0.707107	25	23	1	2	0.92	0.958333
9	37	41	39	2.82843	37	38.5	5	1	0.974684	0.885057
10	23	22	22.5	0.707107	20	20	2.5	0	1	0.888889
11	34	34	34	0	34	32	2	2	0.941176	0.941176
12	21	19	20	1.41421	19	18.5	1.5	0.5	0.973684	0.925
13	26	22	24	2.82843	22	21.5	2.5	0.5	0.977273	0.895833
14	31	27	29	2.82843	33	30	1	3	0.909091	0.967742
15	29	29	29	0	28	27.5	2	1	0.964912	0.932203
16	18	18	18	0	18	17	1	1	0.944444	0.944444
17	28	29	28.5	0.707107	28	28	1	0.5	0.982456	0.965517
18	28	26	27	1.41421	27	26	1	1	0.962963	0.962963
19	28	29	28.5	0.707107	26	26	2.5	0	1	0.912281
20	29	31	30	1.41421	28	27	3.5	1.5	0.947368	0.885246
21	32	31	31.5	0.707107	32	31	0.5	1	0.96875	0.984127
22	12	11	11.5	0.707107	11	11	0.5	0	1	0.956522
23	39	40	39.5	0.707107	39	37	2.5	2	0.948718	0.936709
24	18	17	17.5	0.707107	19	17.5	0	1.5	0.921053	1
25	21	21	21	0	17	17	4	0	1	0.809524
26	20	19	19.5	0.707107	20	18.5	1	1.5	0.925	0.948718
